# Supplementary material for: Balancing model-based and memory-free action selection under competitive pressure
Source: eLife journal article supplement (doi:10.7554/elife.48810), 2019-10-02
Supplement: supp [file elife-48810-supp-v1.zip]

Archive with 10 entries (10 files):
- elife_poa_e48810_Figure_5_figure_supplement_2.pdf
- elife_poa_e48810_Figure_2_figure_supplement_2.pdf
- elife_poa_e48810_Figure_2_figure_supplement_4.pdf
- elife_poa_e48810_Figure_5_figure_supplement_1.pdf
- elife_poa_e48810_Figure_5_figure_supplement_1.pdf
- elife_poa_e48810_Figure_4_figure_supplement_1.pdf
- elife_poa_e48810_Figure_2_figure_supplement_1.pdf
- elife_poa_e48810_Transparent_Reporting_File.docx
- elife_poa_e48810_Figure_4_figure_supplement_2.pdf
- elife_poa_e48810_Figure_2_figure_supplement_3.pdf
