# Supplementary figures and images for: Balancing model-based and memory-free action selection under competitive pressure
Source: eLife journal article supplement (doi:10.7554/elife.48810), 2019-10-02

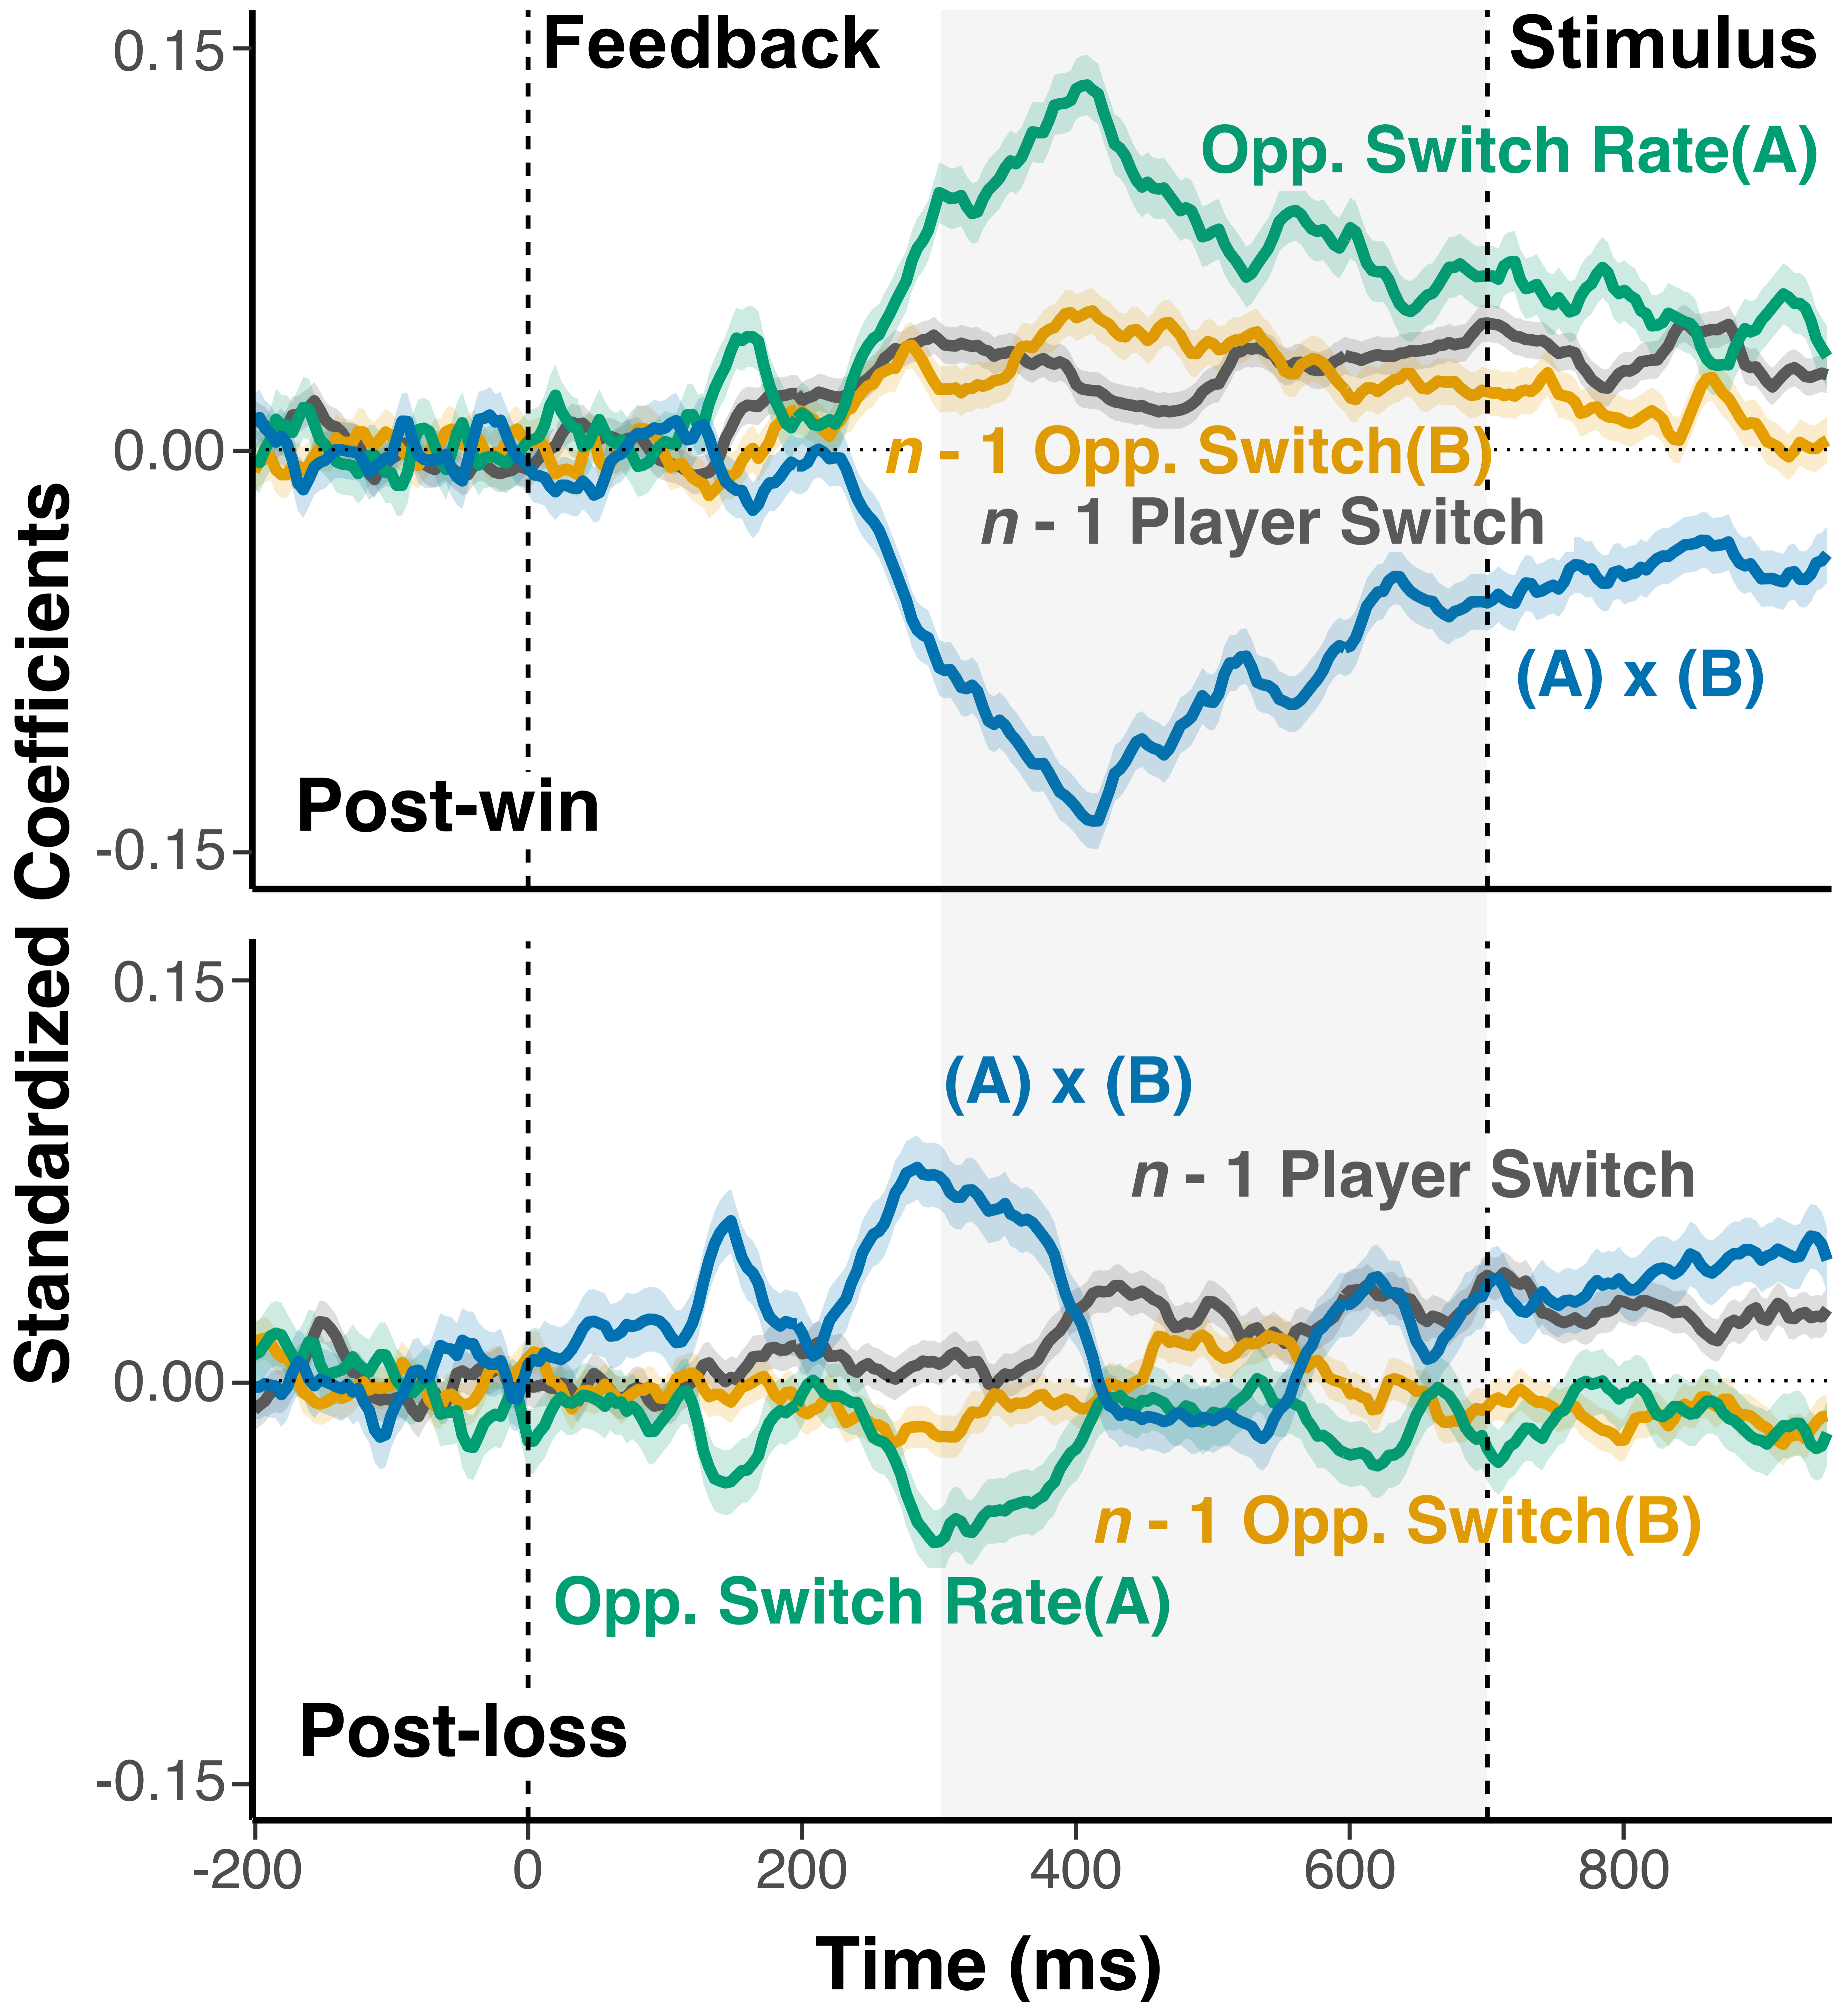

Supplement: supp [file elife-48810-supp-v1.zip › elife_poa_e48810_Figure_5_figure_supplement_2.pdf]

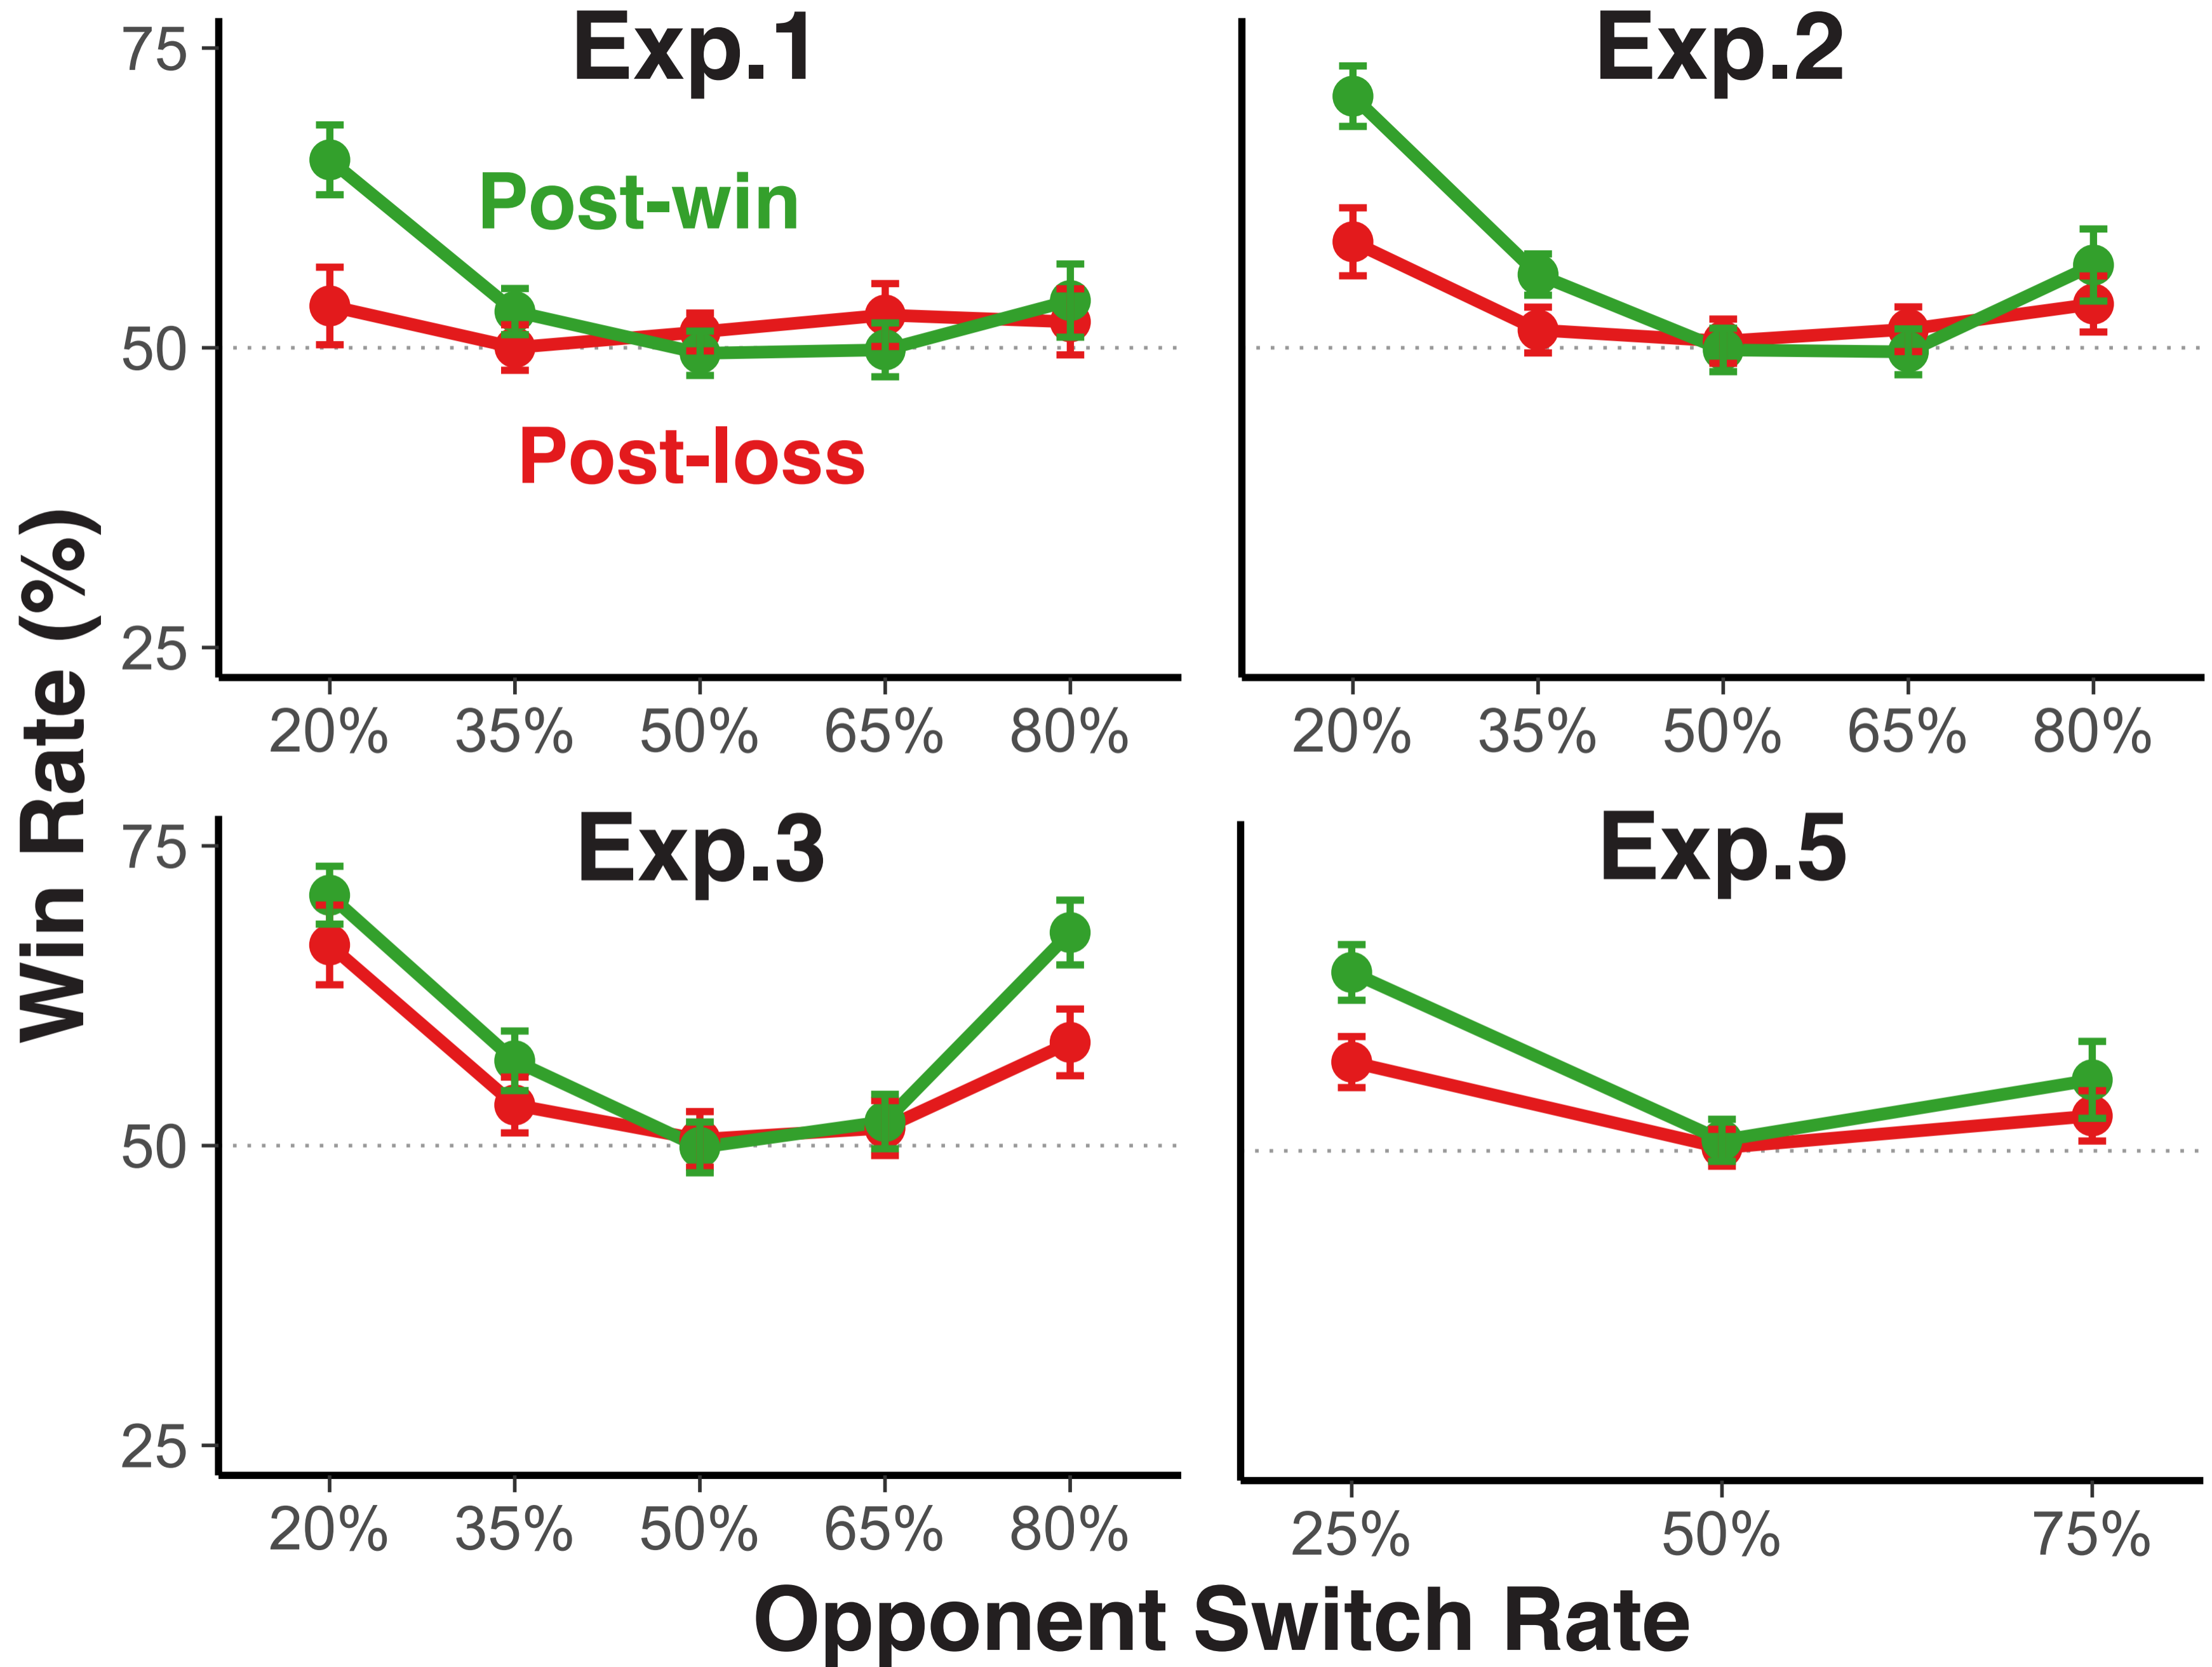

Supplement: supp [file elife-48810-supp-v1.zip › elife_poa_e48810_Figure_2_figure_supplement_2.pdf]

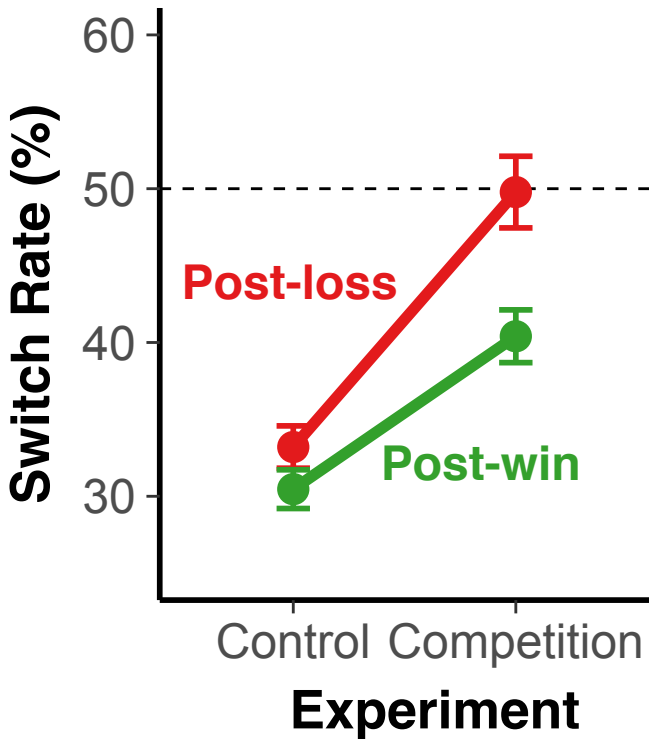

Supplement: supp [file elife-48810-supp-v1.zip › elife_poa_e48810_Figure_2_figure_supplement_4.pdf]

**$n - 1$  Player Switch**

**$n - 1$  Player NoSwitch**

**25% Opp. Switch Rate**

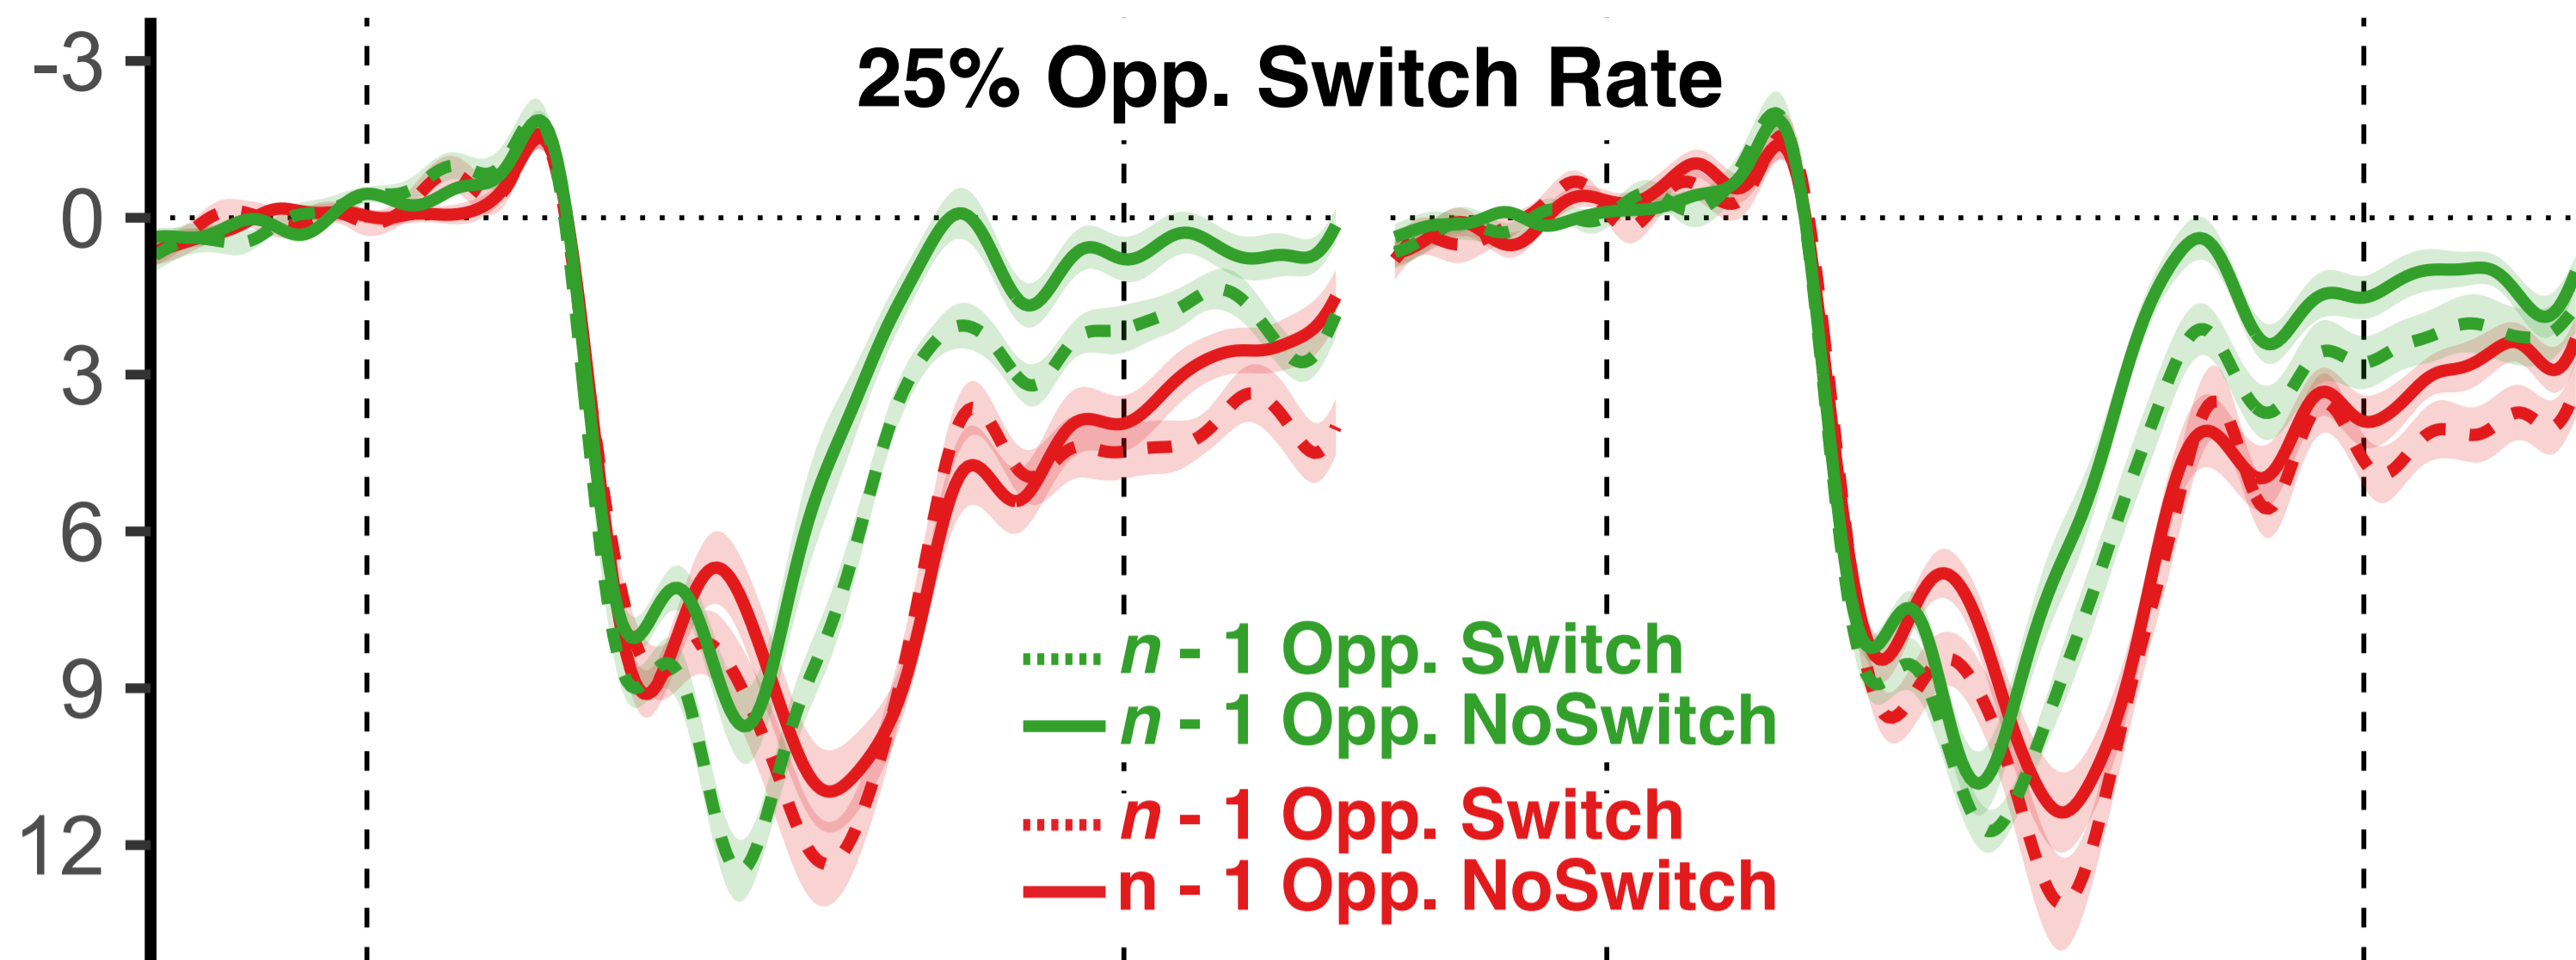

**50% Opp. Switch Rate**

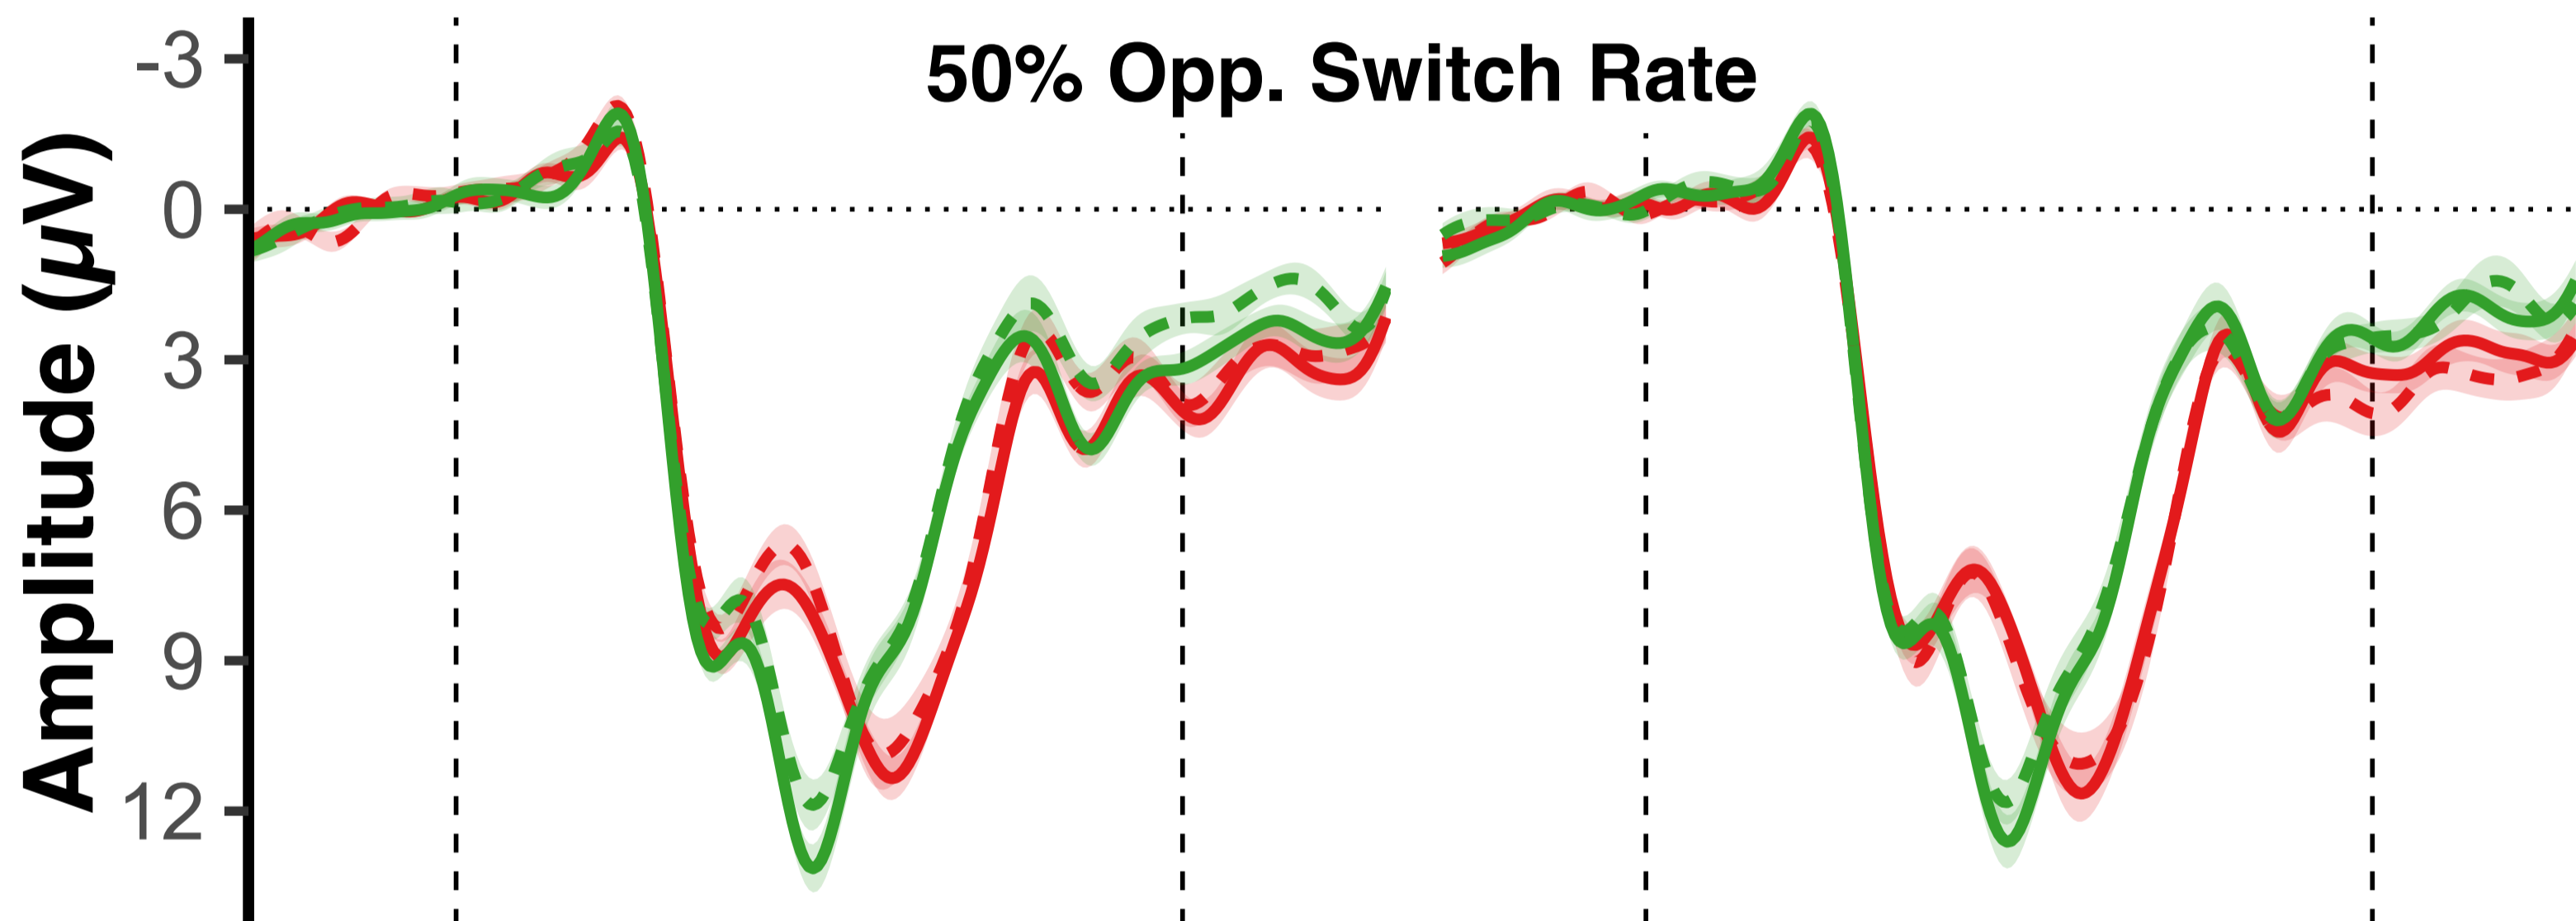

**75% Opp. Switch Rate**

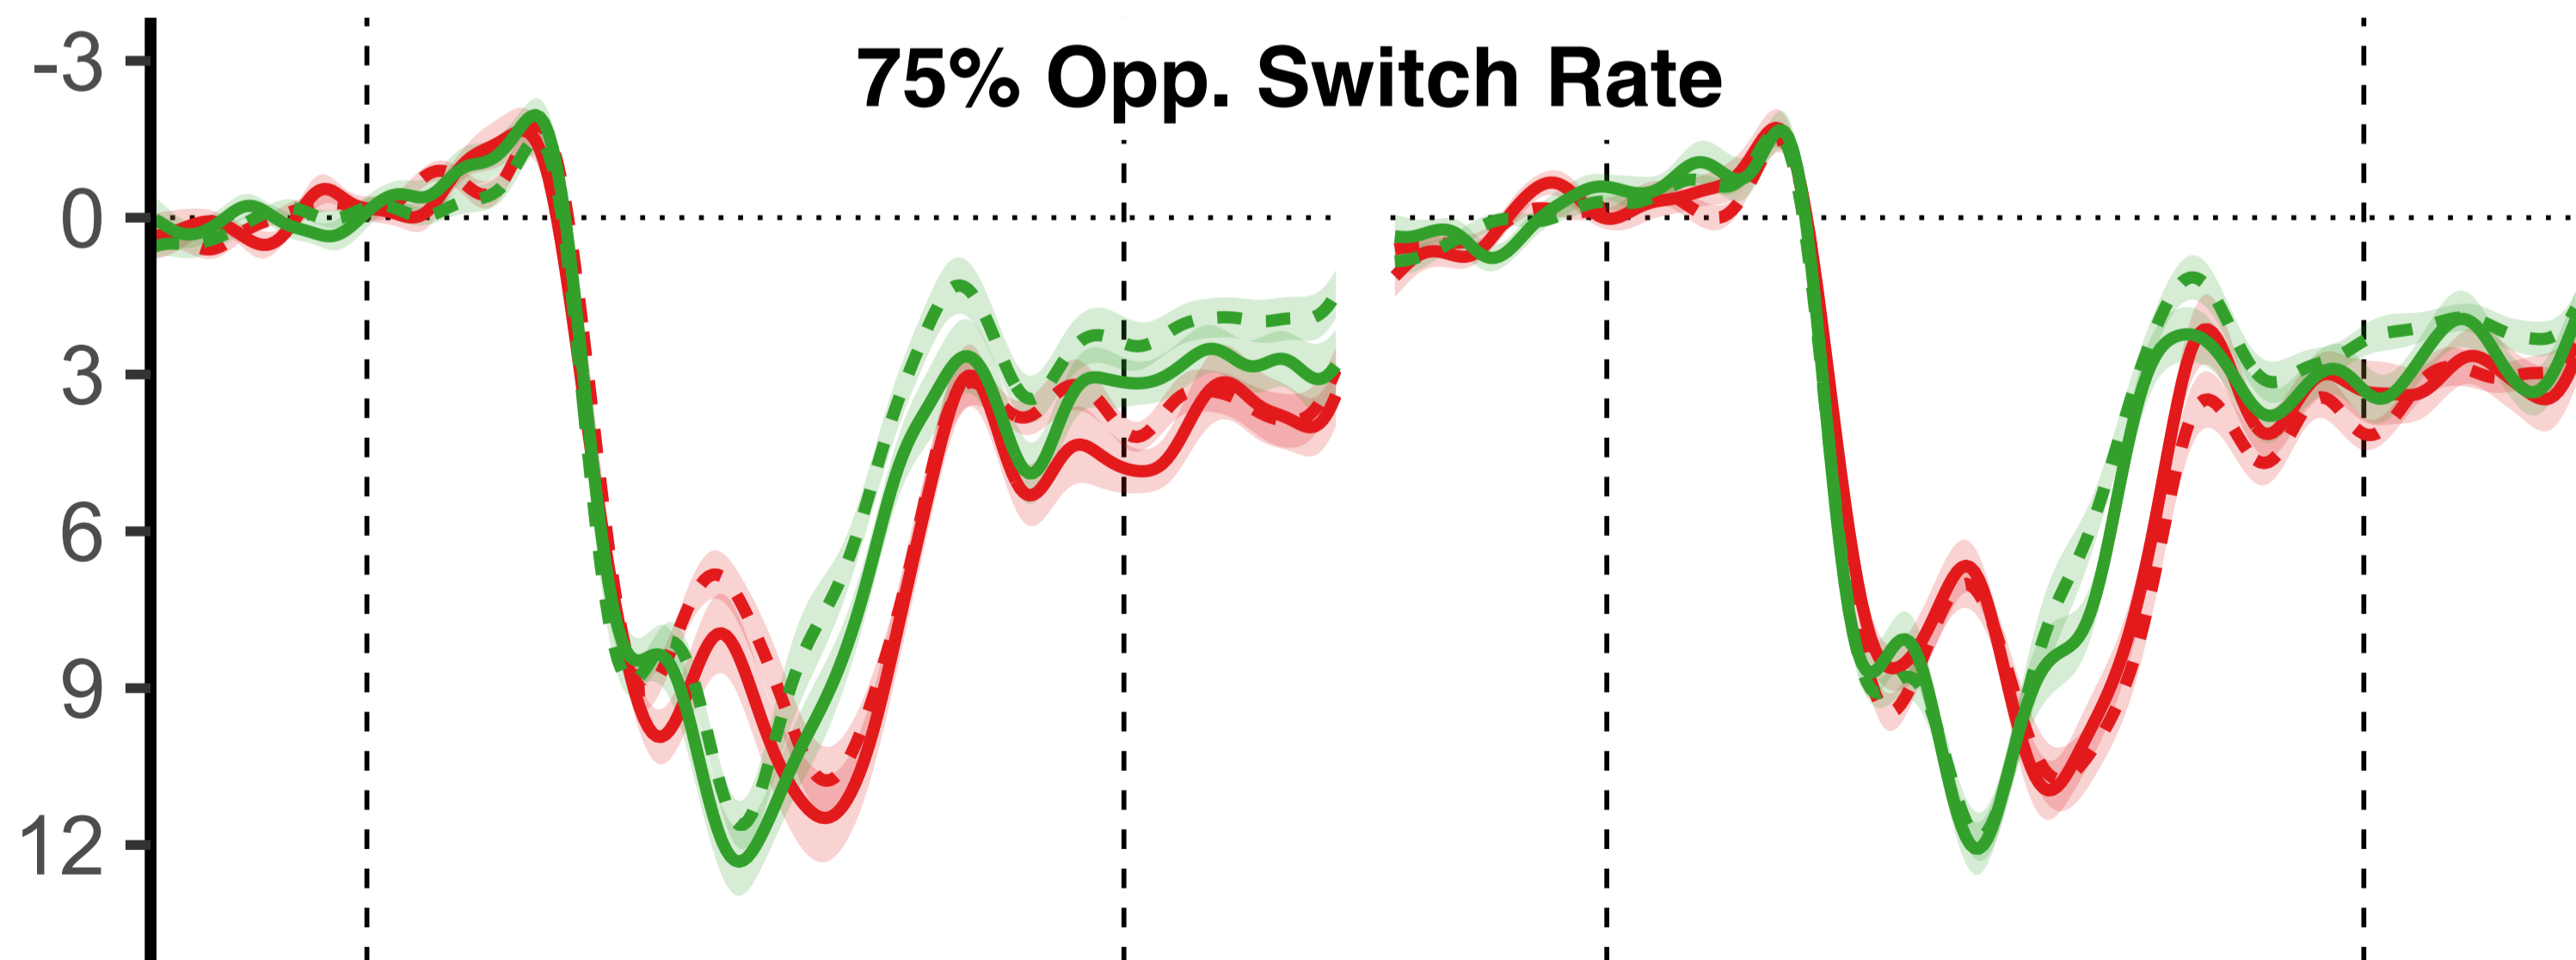

**Time (ms)**

Supplement: supp [file elife-48810-supp-v1.zip › elife_poa_e48810_Figure_5_figure_supplement_1.pdf]

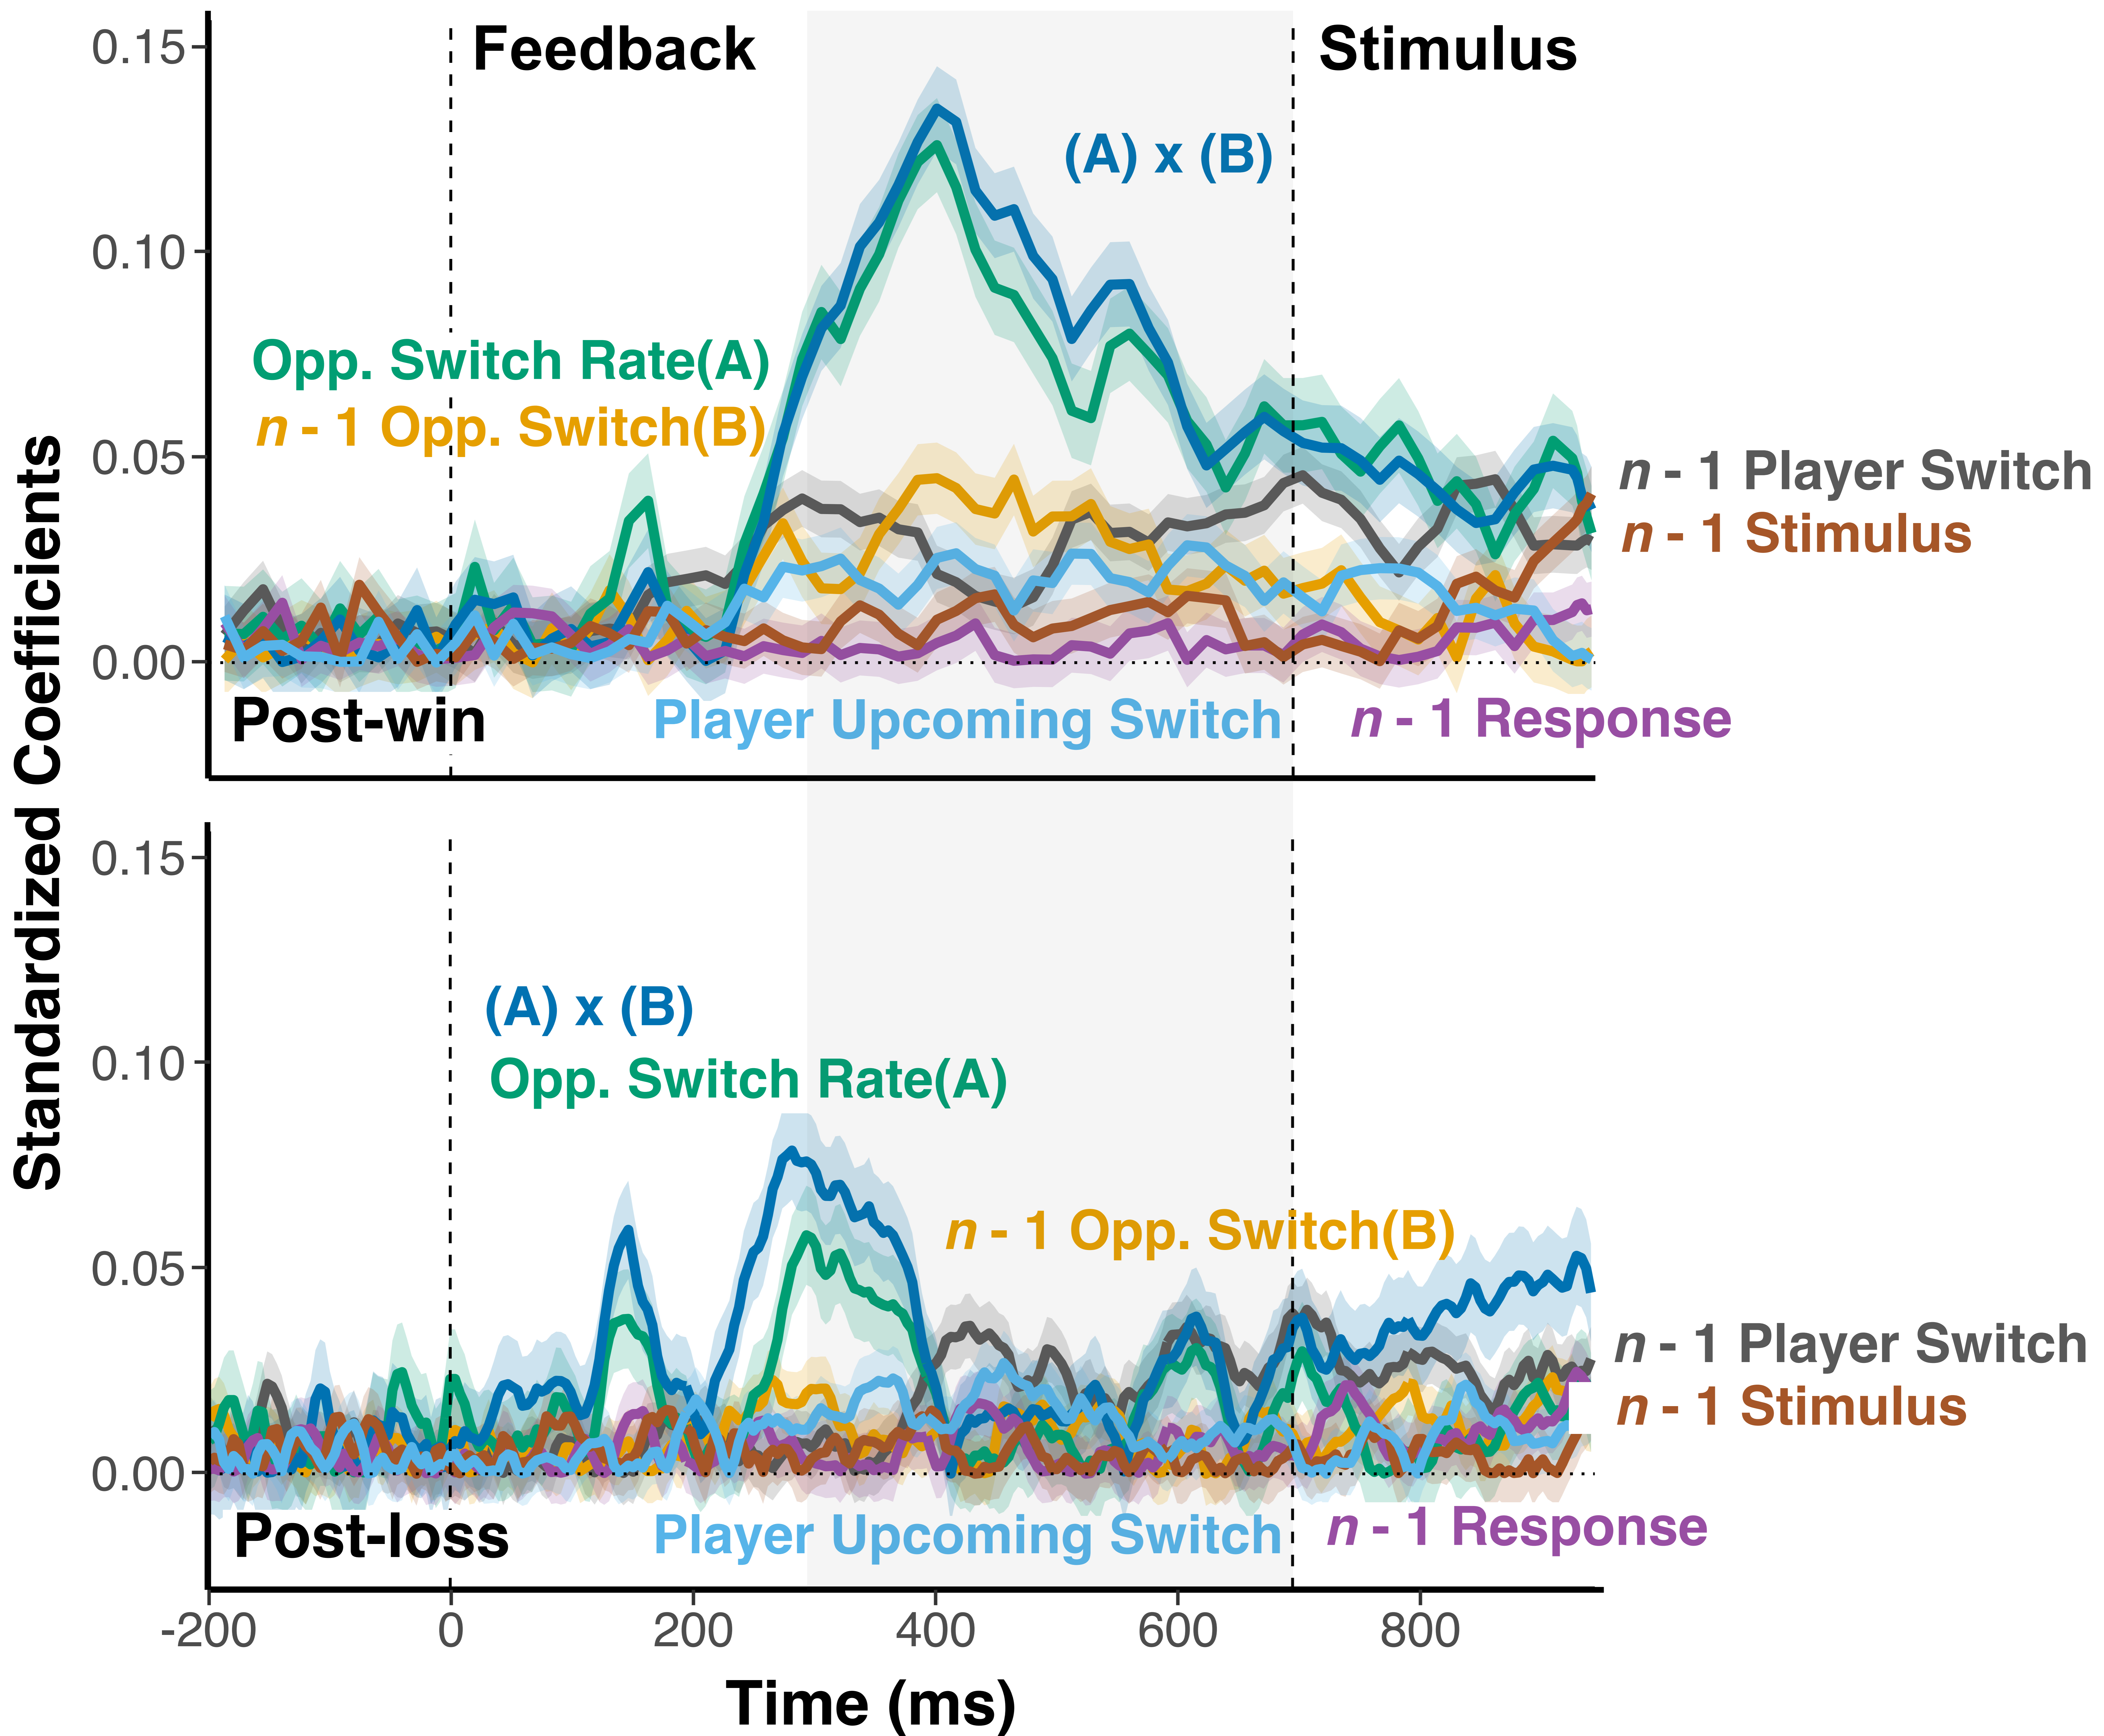

Supplement: supp [file elife-48810-supp-v1.zip › elife_poa_e48810_Figure_5_figure_supplement_1.pdf]

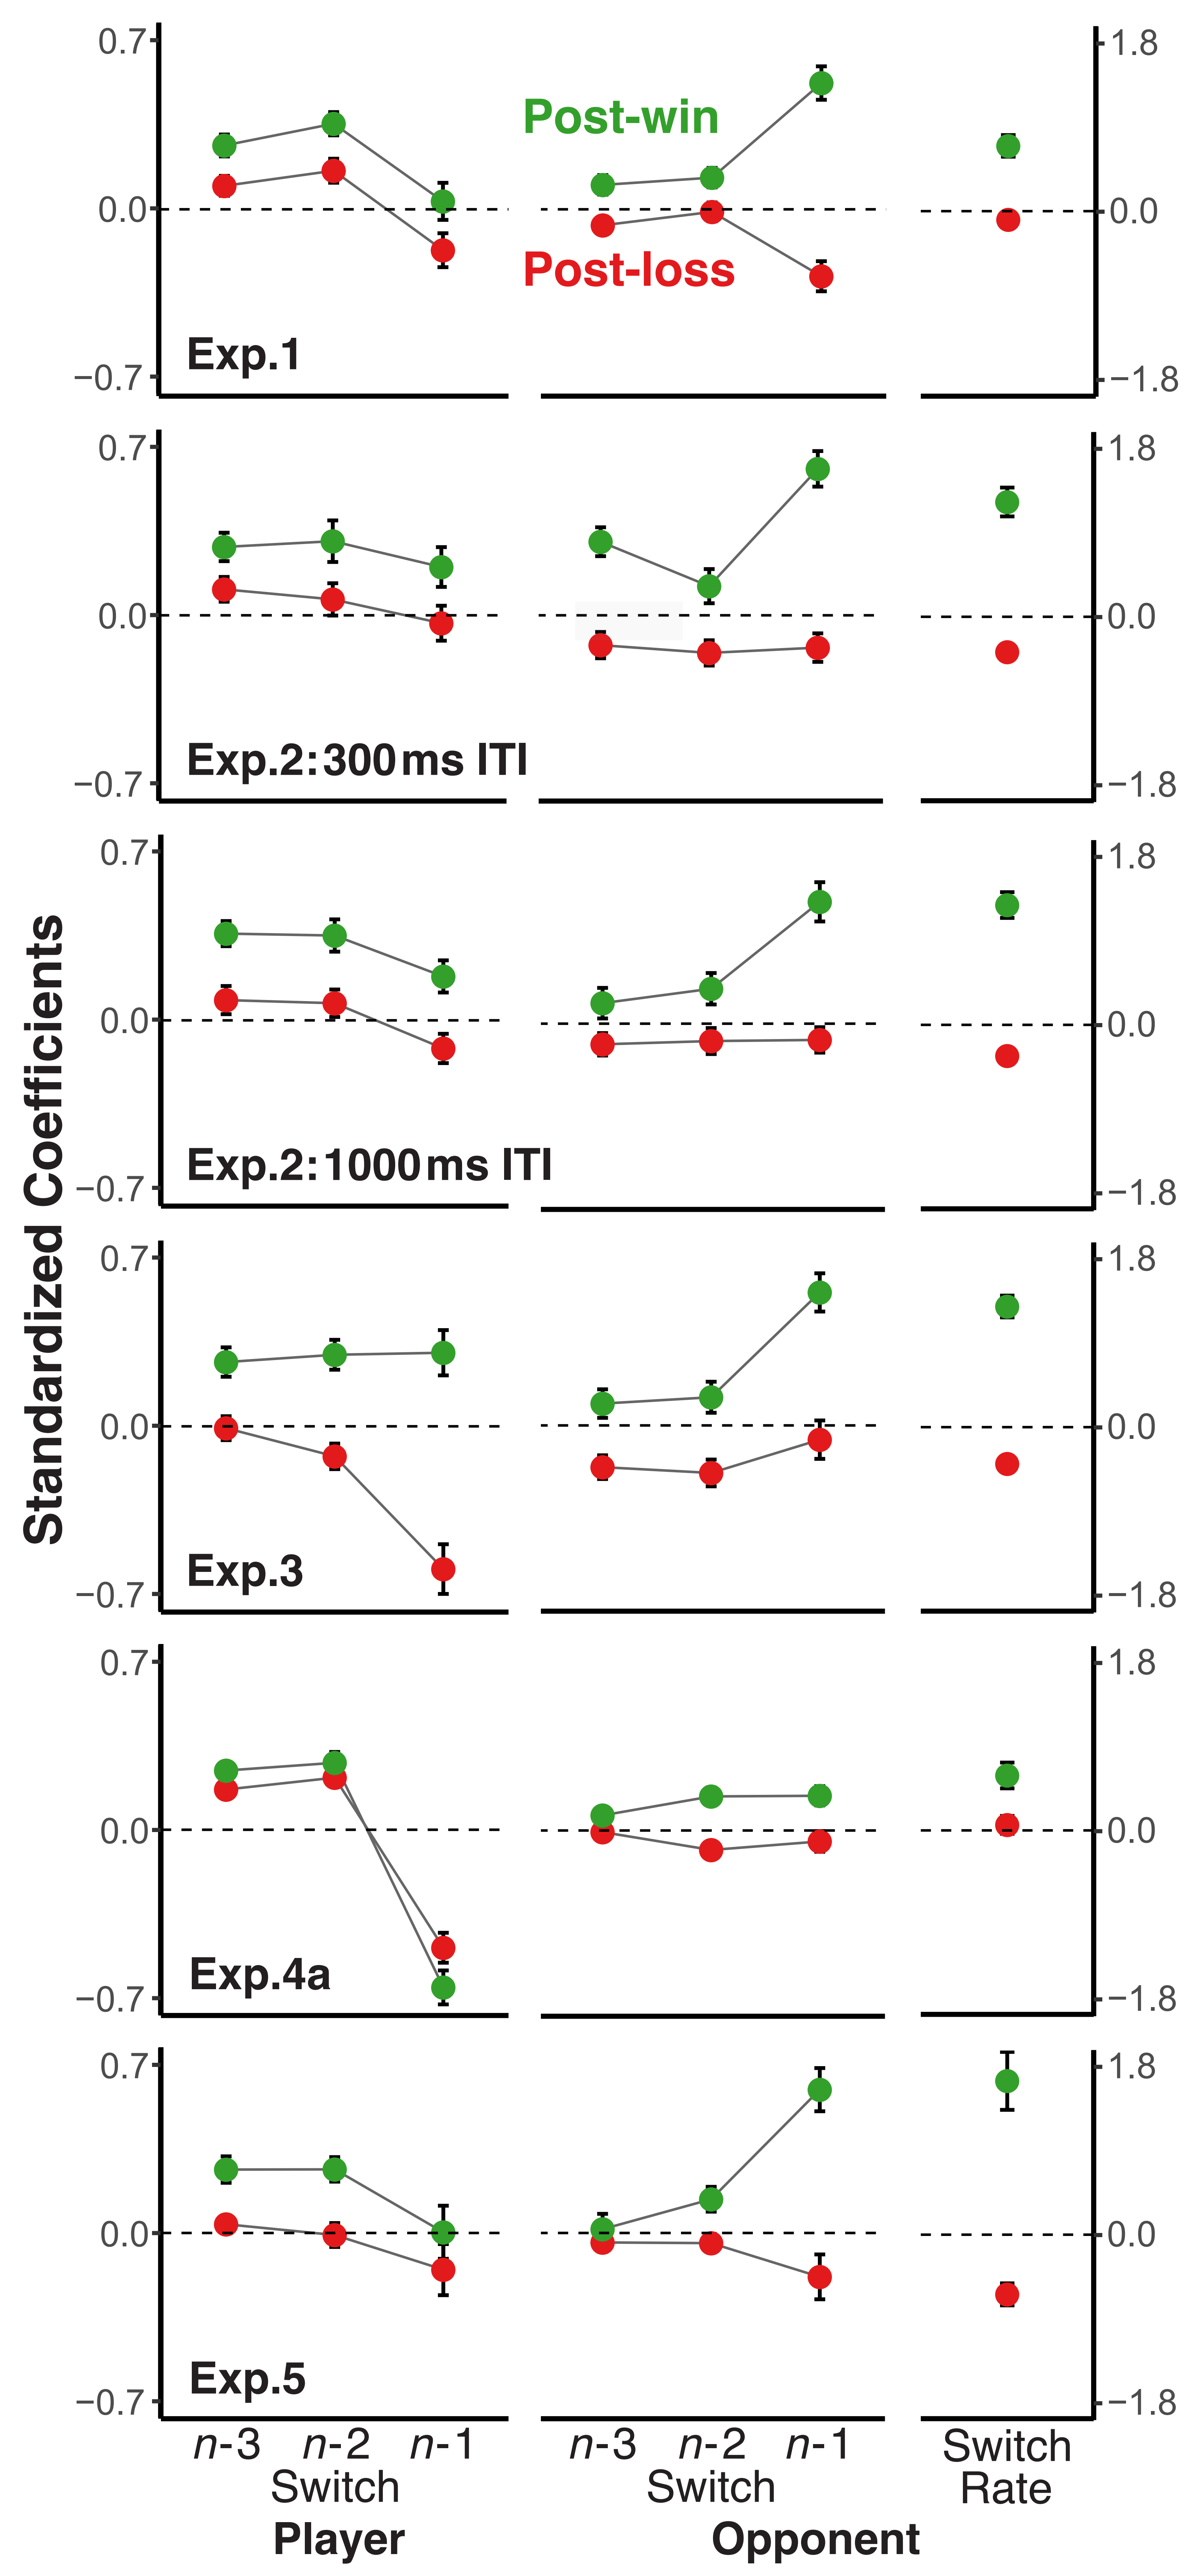

Supplement: supp [file elife-48810-supp-v1.zip › elife_poa_e48810_Figure_4_figure_supplement_1.pdf]

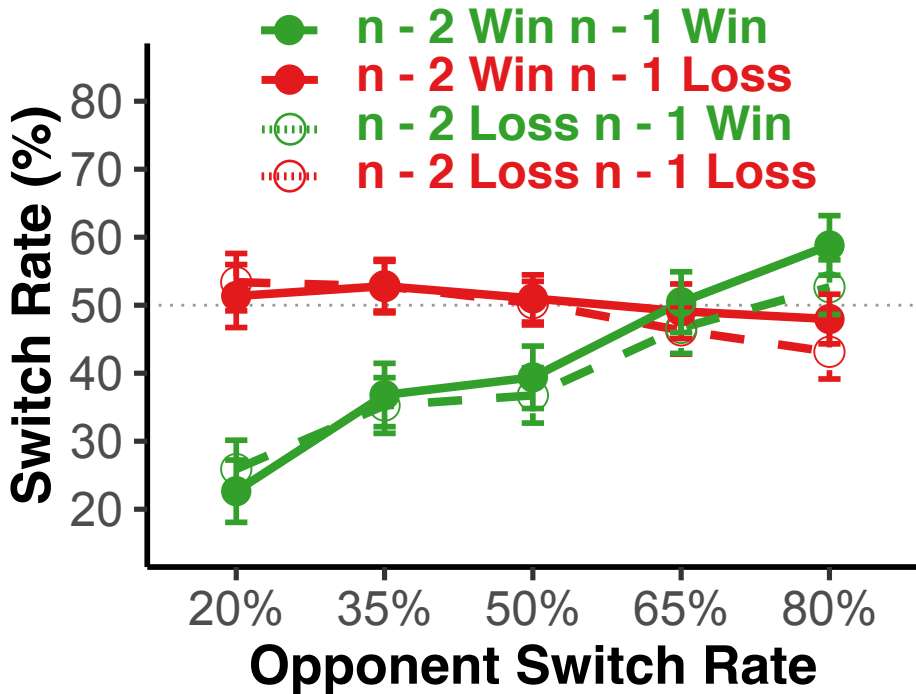

Supplement: supp [file elife-48810-supp-v1.zip › elife_poa_e48810_Figure_2_figure_supplement_1.pdf]

Frequency

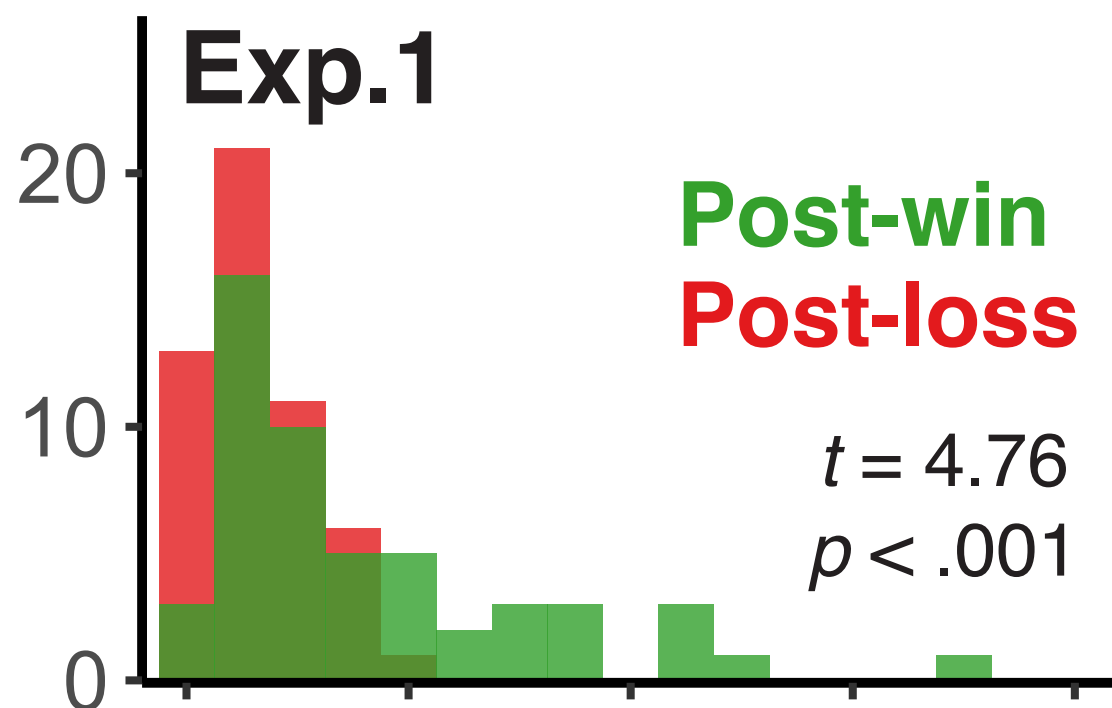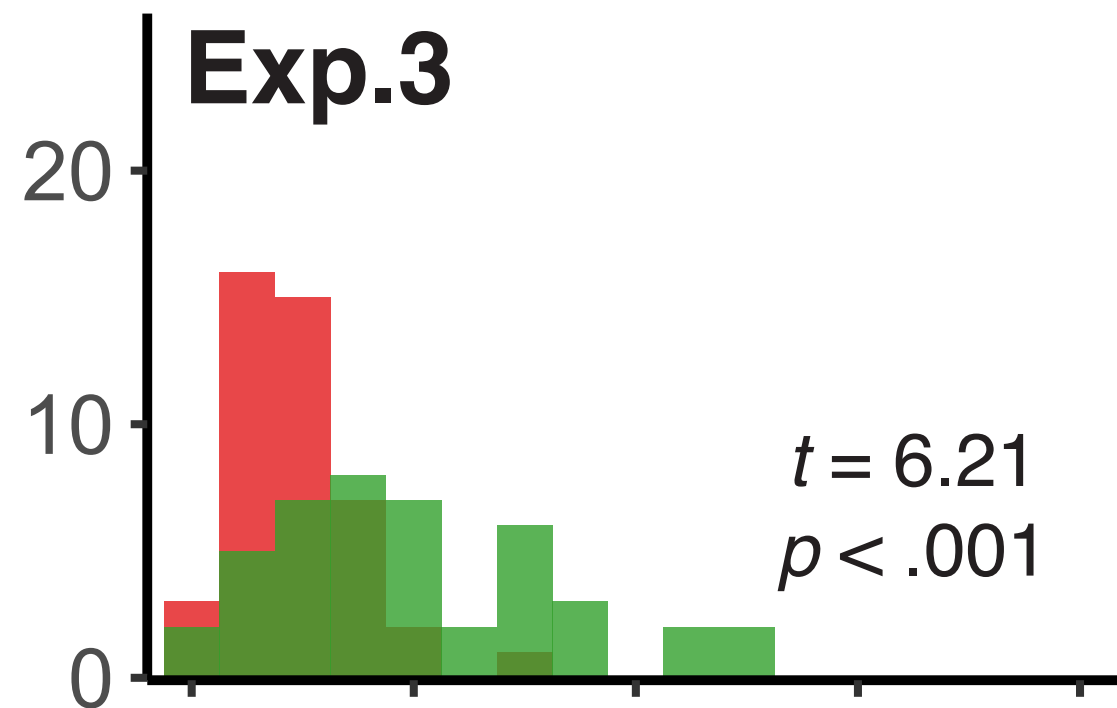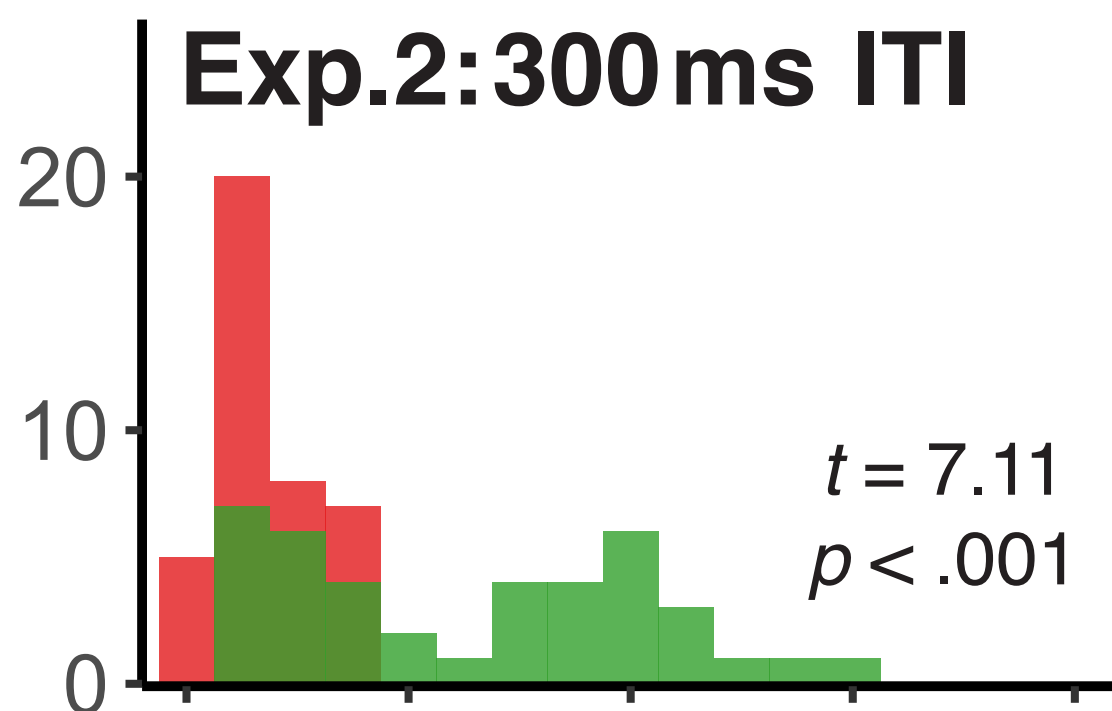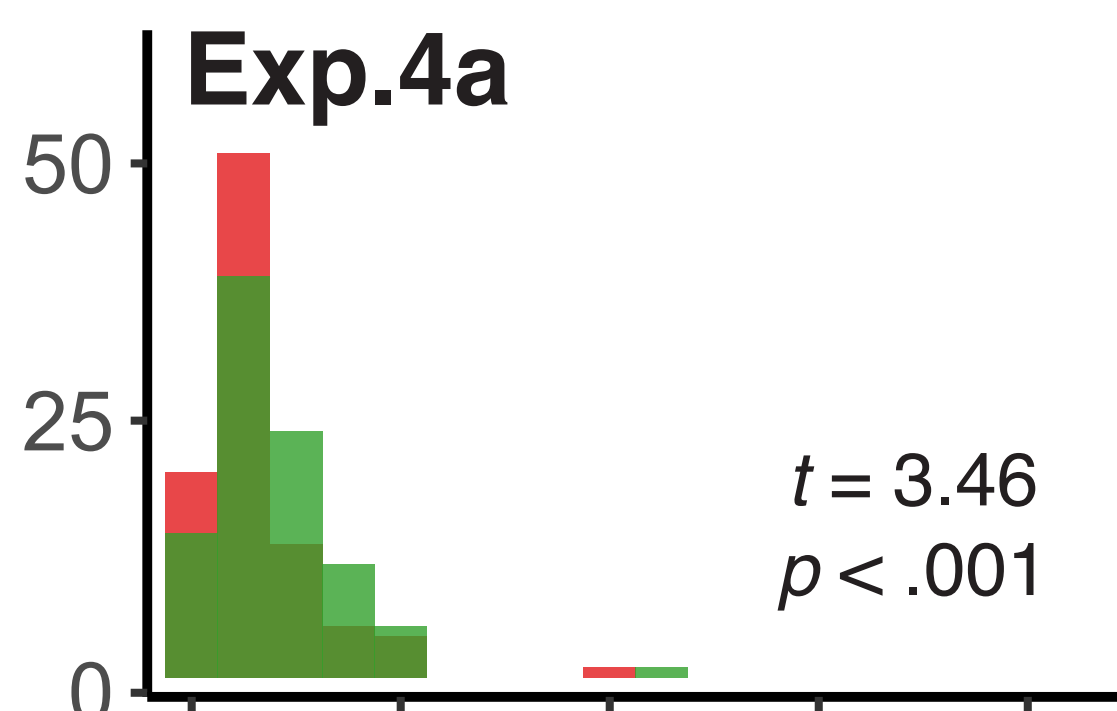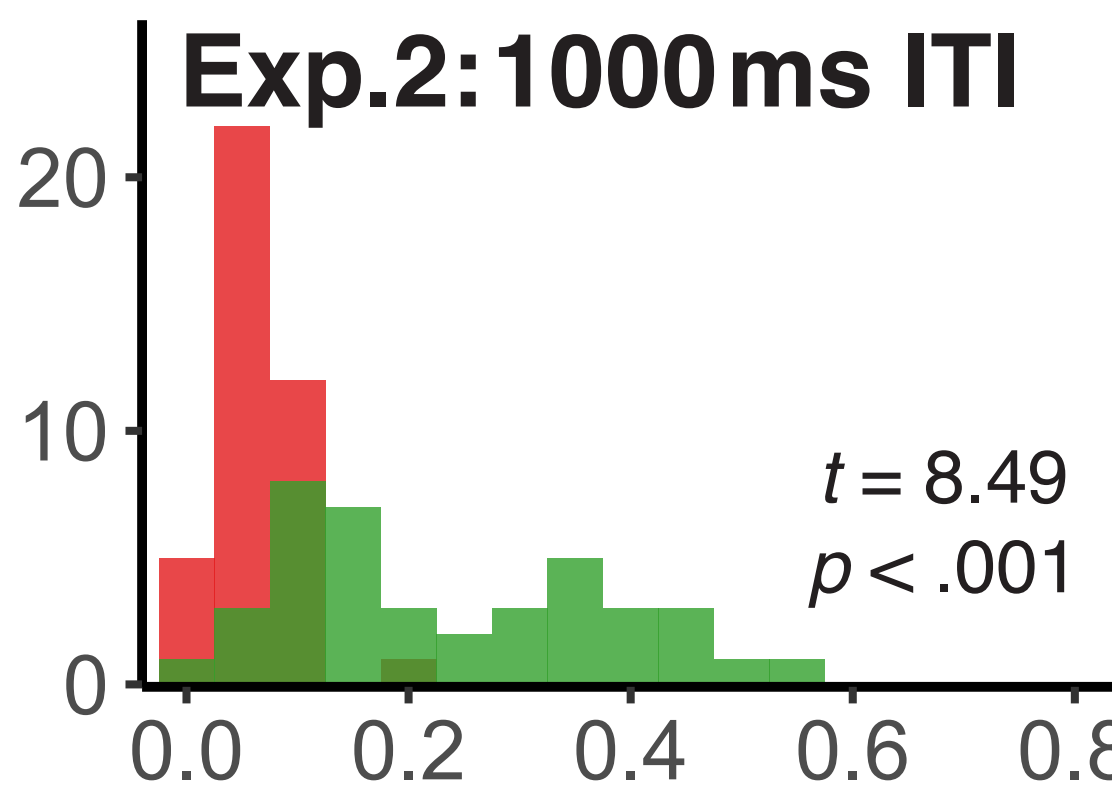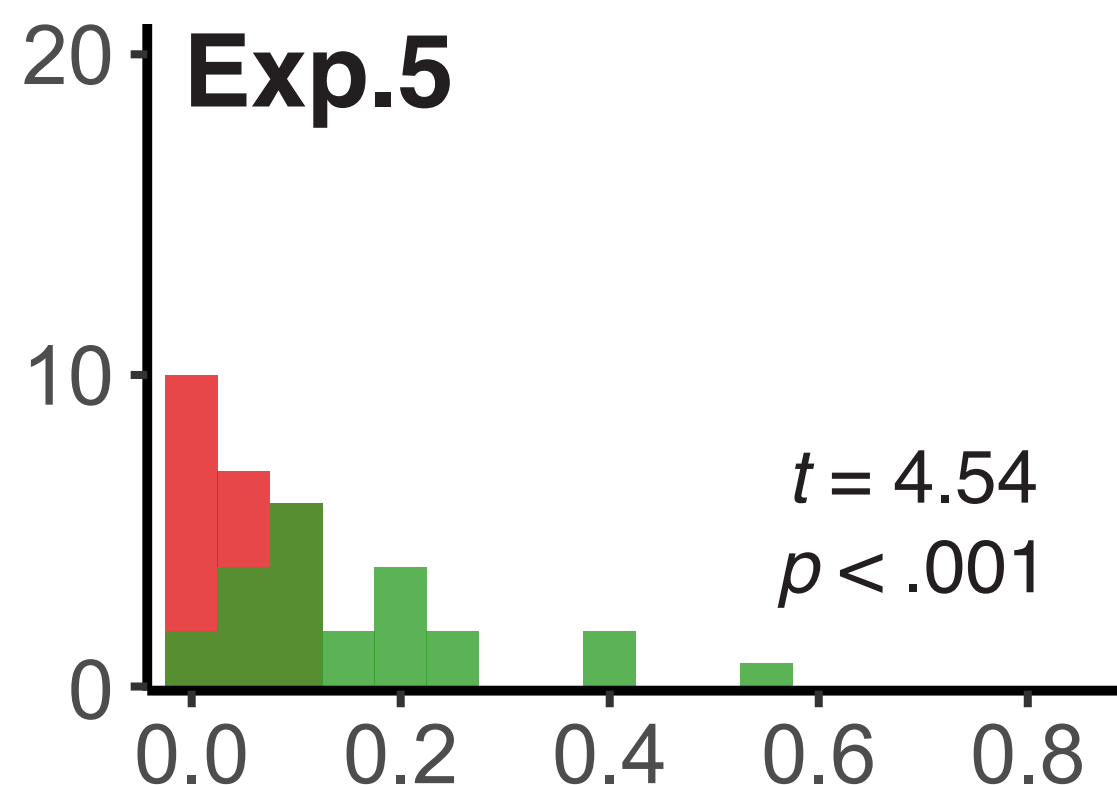

$R^2$

Supplement: supp [file elife-48810-supp-v1.zip › elife_poa_e48810_Figure_4_figure_supplement_2.pdf]

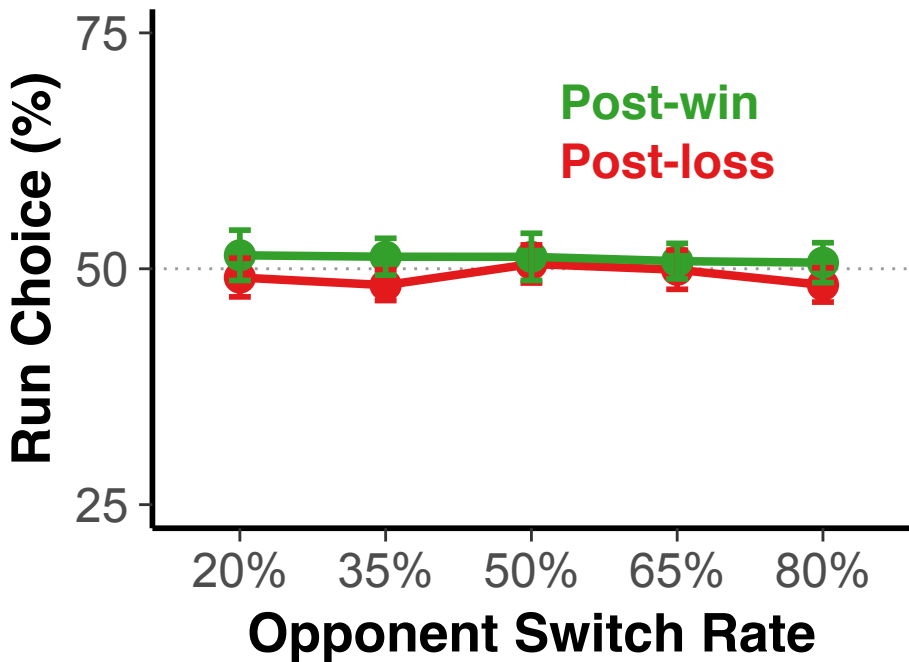

Supplement: supp [file elife-48810-supp-v1.zip › elife_poa_e48810_Figure_2_figure_supplement_3.pdf]
